# Supplementary material for: A Comparative Pharmacokinetic Study of Fexuprazan 10 mg: Demonstrating Bioequivalence with the Reference Formulation and Evaluating Steady State
Source: MDPI journal article supplement (doi:10.3390/ph16081141), 2023-08-11
Supplement: s1 [file s1]

**Table S1.** Comparison between a newly developed fexuprazan 10mg and the formulation used in first in-human study.

|                        | fexuprazan 10 mg<br>used in this study                                            | fexuprazan 10 mg<br>used in the first in-human study                               |
|------------------------|-----------------------------------------------------------------------------------|------------------------------------------------------------------------------------|
| indices of the size    | 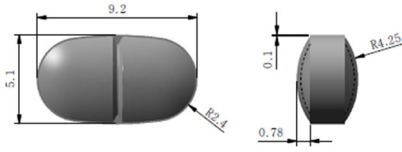 |  |
| appearance             | Orange, oblong, film-coated tablet                                                | White, round, film-coated tablet                                                   |
| length                 | 9.2 mm                                                                            | 7.0 mm                                                                             |
| width                  | 5.1 mm                                                                            | 7.0 mm                                                                             |
| depth                  | 2.4 mm                                                                            | 3.2 mm                                                                             |
| length + width + depth | 16.7 mm                                                                           | 17.2 mm                                                                            |
| weight                 | 157.5 mg                                                                          | 156 mg                                                                             |
| ingredient             | fexuprazan 10 mg                                                                  | fexuprazan 10 mg                                                                   |
